# Supplementary material for: Vaporization of Ni, Al and Cr in Ni-Base Alloys and Its Influence on Surface Defect Formation During Manufacturing of Single-Crystal Components
Source: Springer Nature journal article supplement (doi:10.1007/s11661-019-05498-1), 2019-10-16
Supplement: MOESM1 [file 17280896]

**Appendix**

**Table A1** Liquidus and solidus temperatures of Ni-Al-Cr alloys

| Alloys | Liquidus temperature (K) | Solidus temperature (K) |
| --- | --- | --- |
| Ni-2Cr-12Al | 1434.0 | 1424.0 |
| Ni-5Cr-12Al | 1422.9 | 1408.4 |
| Ni-15Cr-12Al | 1396.8 | 1370.2 |
| Ni-20Cr-12Al | 1379.5 | 1354.8 |
| Ni-30Cr-12Al | 1340.0 | 1319.1 |
